# Supplementary material for: Population-based analysis of POT1 variants in a cutaneous melanoma case–control cohort
Source: J Med Genet. 2022 Dec 20;60(7):692–6. doi: 10.1136/jmg-2022-108776 (PMC10279804; doi:10.1136/jmg-2022-108776)
Supplement: Supplementary data [file jmg-2022-108776supp006.xlsx]

## Sheet: Supplementary_Table_2_newID
Supplementary Table 14. All protein-altering variants in POT1 found in this study after the first round of sequencing. Coordinates are in the GRCh37 reference genome. Details of the number of samples that were re-sequenced for confirmation and other information are included. Variants confirmed are highlighted in green.
Variant	Protein change (reference: protein - ENSP00000350249, cDNA: ENST00000357628)	Total number of samples	Number of cases	Number of controls	Case Ids	Control Ids	Number of samples resequenced	Ids of samples resequenced	Number of samples where variant was confirmed	Ratio of samples where variant was confirmed	Details
7:124464027,C/T	p.Asp632Asn	1	1	0	PD30660a		1	PD30660a	0	0
7:124464033,C/T	p.Ala630Thr	1	0	1		PD30742a	1	PD30742a	0	0
7:124464036,C/G	p.Val629Leu	1	1	0	PD30716a		1	PD30716a	1	1	PD30716a:0/1
7:124464049,A/C	p.Ile624Met	1	0	1		PD30747a	1	PD30747a	1	1	PD30747a:0/1
7:124464059,C/T	p.Cys621Tyr	1	1	0	PD30637a		1	PD30637a	0	0
7:124464068,TTA/T	p.Asp617GlufsTer9	3	1	2	Case_2636	Ctrl_1401,Ctrl_3151	3	Case_2636,Ctrl_1401,Ctrl_3151	3	1	*Confirmed in all by capillary
7:124464075,T/C	p.Thr616Ala	1	0	1		PD30599a	1	PD30599a	0	0
7:124464080,T/C	p.Asn614Ser	1	0	1		PD30597a	1	PD30597a	1	1	PD30597a:0/1
7:124464089,T/C	p.Asn611Ser	1	1	0	PD30698a		1	PD30698a	1	1	PD30698a:0/1
7:124464111,C/T	p.Glu604Lys	2	2	0	PD30644a,PD30659a		2	PD30644a,PD30659a	0	0
7:124464119,G/A	p.Pro601Leu	1	1	0	PD30610a		1	PD30610a	0	0	*False positive by capillary
7:124465306,C/T	p.Asp598Asn	1	1	0	PD30625a		1	PD30625a	0	0
7:124465356,T/C	p.Lys581Arg	1	1	0	PD30700a		1	PD30700a	1	1	PD30700a:0/1
7:124465363,G/A	p.Leu579Phe	1	1	0	PD30656a		1	PD30656a	0	0
7:124465412,C/A	c.1687-1G>T	1	1	0	PD30656a		1	PD30656a	0	0
7:124465412,C/T	c.1687-1G>A	1	0	1		PD30567a	1	PD30567a	1	1	PD30567a:0/1
7:124467279,G/T	p.Leu559Ile	1	1	0	PD30663a		1	PD30663a	0	0
7:124467306,C/T	p.Asp550Asn	1	1	0	PD30656a		1	PD30656a	0	0
7:124467318,A/G	p.Phe546Leu	1	0	1		PD30611a	1	PD30611a	0	0
7:124469308,C/G	p.Ala532Pro	1	1	0	PD30584a		1	PD30584a	1	1	PD30584a:0/1
7:124469313,G/A	p.Ala530Val	1	1	0	PD30662a		1	PD30662a	0	0
7:124469329,T/A	p.Ile525Phe	1	1	0	PD30684a		1	PD30684a	0	0
7:124469337,G/A	p.Thr522Ile	1	0	1		PD30547a	1	PD30547a	1	1	PD30547a:0/1
7:124469346,A/G	p.Val519Ala	1	0	1		PD30554a	1	PD30554a	1	1	PD30554a:0/1
7:124469347,C/T	p.Val519Ile	1	0	1		PD30759a	1	PD30759a	1	1	PD30759a:0/1
7:124469379,C/T	p.Ser508Asn	1	1	0	PD30682a		1	PD30682a	0	0
7:124475343,G/A	p.His499Tyr	1	1	0	PD30628a		1	PD30628a	0	0
7:124475357,A/G	p.Ile494Thr	1	1	0	PD30638a		1	PD30638a	0	0
7:124475376,G/A	p.Leu488Phe	1	1	0	PD30637a		1	PD30637a	0	0
7:124475381,A/G	p.Leu486Ser	1	0	1		PD30600a	1	PD30600a	0	0
7:124475396,T/C	p.Glu481Gly	1	0	1		PD30737a	1	PD30737a	1	1	PD30737a:0/1
7:124475399,T/C	p.His480Arg	1	1	0	PD30629a		1	PD30629a	0	0
7:124475400,G/A	p.His480Tyr	1	1	0	PD30652a		1	PD30652a	0	0
7:124475403,C/T	p.Gly479Ser	1	0	1		PD30611a	1	PD30611a	0	0
7:124475454,C/T	p.Glu462Lys	1	1	0	PD30689a		1	PD30689a	0	0
7:124481071,T/C	p.Asn442Ser	1	0	1		PD30738a	1	PD30738a	0	0
7:124481086,T/C	p.His437Arg	1	0	1		PD30754a	1	PD30754a	1	1	PD30754a:0/1
7:124481089,A/G	p.Val436Ala	1	0	1		PD30599a	1	PD30599a	0	0
7:124481093,C/A	p.Ala435Ser	1	1	0	PD30621a		1	PD30621a	0	0
7:124481104,C/T	p.Gly431Glu	1	1	0	PD30634a		1	PD30634a	0	0
7:124481111,G/A	p.Gln429Ter	1	1	0	PD30648a		1	PD30648a	0	0
7:124481114,T/C	p.Asn428Asp	1	0	1		PD30599a	1	PD30599a	0	0
7:124481116,T/C	p.Lys427Arg	1	1	0	PD30693a		1	PD30693a	1	1	PD30693a:0/1
7:124481116,T/G	p.Lys427Thr	1	0	1		PD30749a	1	PD30749a	1	1	PD30749a:0/1
7:124481123,T/C	p.Thr425Ala	1	1	0	PD30644a		1	PD30644a	0	0
7:124481138,C/T	p.Asp420Asn	1	1	0	PD30628a		1	PD30628a	0	0
7:124481140,T/C	p.Tyr419Cys	1	1	0	PD30730a		1	PD30730a	1	1	PD30730a:0/1
7:124481173,G/A	p.Thr408Ile	1	1	0	PD30683a		1	PD30683a	0	0
7:124481183,C/T	p.Ala405Thr	1	0	1		PD30611a	1	PD30611a	0	0
7:124481185,C/A	p.Gly404Val	163	69	94	Case_30,Case_155,Case_183,Case_208,Case_219,Case_390,Case_463,Case_487,Case_488,Case_497,Case_520,Case_538,Case_560,Case_590,Case_645,Case_691,Case_715,Case_940,Case_952,Case_969,Case_999,Case_1066,Case_1086,Case_1125,Case_1138,PD30657a,PD30697a,Case_1258,Case_1278,Case_1287,Case_1338,Case_1411,Case_1430,Case_1547,Case_1573,Case_1582,Case_1699,Case_1707,Case_1708,Case_1732,Case_1748,Case_1767,Cas…	Ctrl_1,Ctrl_90,Ctrl_98,Ctrl_112,Ctrl_123,Ctrl_210,Ctrl_242,Ctrl_334,Ctrl_340,Ctrl_370,Ctrl_374,Ctrl_382,PD30743a,Ctrl_394,Ctrl_588,Ctrl_598,PD30740a,Ctrl_643,Ctrl_845,Ctrl_848,PD30755a,Ctrl_1018,Ctrl_1034,Ctrl_1037,Ctrl_1073,Ctrl_1078,Ctrl_1108,Ctrl_1137,Ctrl_1145,Ctrl_1148,Ctrl_1227,Ctrl_1267,Ctrl_1355,Ctrl_1382,Ctrl_1401,Ctrl_1406,Ctrl_1490,Ctrl_1543,Ctrl_1568,Ctrl_1593,Ctrl_1630,Ctrl_1666,Ctrl…	10	PD30657a,PD30697a,PD30723a,PD30730a,PD30743a,PD30740a,PD30755a,PD30545a,PD30549a,PD30561a	9	0.9	PD30561a:0/1,PD30697a:0/1,PD30545a:0/1,PD30730a:0/1,PD30743a:0/1,PD30740a:0/1,PD30755a:0/1,PD30723a:0/1,PD30549a:0/1
7:124481210,C/G	p.Asp396His	1	0	1		PD30560a	1	PD30560a	1	1	PD30560a:0/1
7:124481210,C/T	p.Asp396Asn	1	0	1		PD30761a	1	PD30761a	1	1	PD30761a:0/1
7:124481216,C/T	p.Glu394Lys	1	1	0	PD30665a		1	PD30665a	0	0
7:124481218,T/C	p.His393Arg	3	3	0	PD30595a,PD30604a,PD30731a		3	PD30595a,PD30604a,PD30731a	3	1	PD30595a:0/1,PD30731a:0/1, PD30604a confirmed by capillary
7:124481222,G/A	p.Pro392Ser	1	1	0	PD30578a		1	PD30578a	0	0
7:124481224,A/G	p.Val391Ala	1	0	1		PD30741a	1	PD30741a	1	1	PD30741a:0/1
7:124481225,C/T	p.Val391Ile	1	1	0	PD30681a		1	PD30681a	0	0	*False positive by capillary
7:124481228,C/T	p.Glu390Lys	1	1	0	PD30643a		1	PD30643a	0	0
7:124481233,C/T	c.1164-1G>A	3	3	0	PD30587a,PD30589a,PD30596a		3	PD30587a,PD30589a,PD30596a	3	1	PD30589a:0/1,PD30587a:0/1,PD30596a:0/1
7:124482877,G/A	p.Pro383Ser	1	1	0	PD30629a		1	PD30629a	0	0
7:124482894,G/A	p.Ser377Phe	1	1	0	PD30701a		1	PD30701a	1	1	PD30701a:0/1
7:124482897,T/C	p.Gln376Arg	10	5	5	PD30590a,PD30727a,PD30728a,PD30699a,PD30705a	PD30752a,PD30753a,PD30757a,PD30762a,PD30744a	10	PD30590a,PD30727a,PD30728a,PD30699a,PD30705a,PD30752a,PD30753a,PD30757a,PD30762a,PD30744a	10	1	PD30728a:0/1,PD30757a:0/1,PD30699a:0/1,PD30753a:0/1,PD30762a:0/1,PD30744a:0/1,PD30705a:0/1,PD30752a:0/1,PD30590a:0/1,PD30727a:0/1
7:124482898,G/A	p.Gln376Ter	1	1	0	PD30687a		1	PD30687a	0	0	*False positive by capillary
7:124482912,G/A	p.Pro371Leu	1	1	0	PD30717a		1	PD30717a	1	1	PD30717a:0/1
7:124482934,C/T	p.Ala364Thr	1	1	0	PD30621a		1	PD30621a	0	0
7:124482936,C/T	p.Arg363Gln	1	0	1		PD30741a	1	PD30741a	1	1	PD30741a:0/1
7:124482952,G/GA	p.Gln358SerfsTer13	1	1	0	Case_1755		1	Case_1755	1	1	*Confirmed by capillary
7:124487004,G/A	p.Ser333Phe	3	2	1	PD30612a,PD30633a	PD30599a	3	PD30612a,PD30633a,PD30599a	0	0
7:124487005,A/G	p.Ser333Phe	1	1	0	PD30642a		1	PD30642a	0	0
7:124487011,G/A	p.Gln331Ter	1	1	0	PD30625a		1	PD30625a	0	0
7:124487014,G/A	p.Gln330Ter	1	1	0	PD30659a		1	PD30659a	0	0
7:124487020,T/C	p.Arg328Gly	1	1	0	PD30607a		1	PD30607a	0	0
7:124487029,C/T	p.Glu325Lys	1	1	0	PD30603a		1	PD30603a	0	0
7:124491956,A/G	p.Cys307Arg	1	1	0	PD30582a		1	PD30582a	0	0	*False positive by capillary
7:124491961,A/G	p.Val305Ala	1	1	0	PD30668a		1	PD30668a	0	0
7:124491968,A/G	p.Ser303Phe	1	1	0	PD30661a		1	PD30661a	0	0
7:124491972,C/A	p.Gln301His	90	46	44	Case_31,Case_154,Case_242,Case_375,PD30586a,Case_444,Case_485,Case_512,Case_516,Case_557,Case_610,Case_694,Case_707,Case_741,Case_758,Case_811,Case_812,Case_952,Case_975,Case_1045,Case_1057,Case_1137,Case_1154,PD30627a,Case_1234,Case_1245,Case_1323,Case_1377,Case_1419,Case_1587,Case_1590,Case_1599,Case_1610,Case_1639,Case_1710,Case_1780,Case_1818,Case_1848,Case_1976,PD30720a,PD30733a,Case_2299,Ca…	Ctrl_30,Ctrl_116,Ctrl_285,Ctrl_304,PD30760a,Ctrl_355,Ctrl_472,Ctrl_599,PD30758a,Ctrl_730,Ctrl_785,Ctrl_818,Ctrl_862,Ctrl_882,PD30745a,Ctrl_963,Ctrl_1022,Ctrl_1231,Ctrl_1332,Ctrl_1429,PD30591a,Ctrl_1485,Ctrl_1771,Ctrl_1815,Ctrl_1889,Ctrl_1971,Ctrl_2008,Ctrl_2045,Ctrl_2108,Ctrl_2229,Ctrl_2308,Ctrl_2351,PD30563a,Ctrl_2630,Ctrl_2675,Ctrl_2686,Ctrl_2772,Ctrl_2928,Ctrl_3046,Ctrl_3088,Ctrl_3101,Ctrl_313…	9	PD30586a,PD30627a,PD30720a,PD30733a,PD30760a,PD30758a,PD30745a,PD30591a,PD30563a	9	1	PD30591a:0/1,PD30720a:0/1,PD30745a:0/1,PD30758a:0/1,PD30733a:0/1,PD30563a:0/1,PD30627a:0/1,PD30586a:0/1,PD30760a:0/1
7:124492004,C/T	p.Asp291Asn	1	1	0	PD30651a		1	PD30651a	0	0
7:124493042,C/T	p.Val285Met	2	2	0	PD30578a,PD30621a		2	PD30578a,PD30621a	0	0
7:124493047,G/T	p.Ser283Tyr	1	1	0	PD30578a		1	PD30578a	0	0
7:124493050,T/C	p.Asn282Ser	1	0	1		PD30746a	1	PD30746a	0	0
7:124493068,C/T	p.Arg276Lys	2	2	0	PD30647a,PD30639a		2	PD30647a,PD30639a	0	0
7:124493077,C/A	p.Arg273Leu	1	1	0	PD30588a		1	PD30588a	1	1	PD30588a:0/1
7:124493090,T/C	p.Thr269Ala	1	1	0	PD30652a		1	PD30652a	0	0
7:124493111,C/T	p.Glu262Lys	1	1	0	PD30583a		1	PD30583a	0	0
7:124493119,A/C	p.Leu259Ter	1	0	1		PD30546a	1	PD30546a	1	1	PD30546a:0/1
7:124493152,A/G	p.Leu248Pro	1	1	0	PD30646a		1	PD30646a	0	0
7:124493161,T/C	p.His245Arg	1	1	0	PD30634a		1	PD30634a	0	0
7:124493171,A/G	p.Tyr242His	1	0	1		PD30592a	1	PD30592a	0	0
7:124499043,C/T	p.Asp224Asn	6	4	2	PD30598a,PD30605a,PD30735a,PD30715a	PD30606a,PD30575a	6	PD30598a,PD30605a,PD30735a,PD30715a,PD30606a,PD30575a	6	1	PD30598a:0/1,PD30605a:0/1,PD30735a:0/1,PD30715a:0/1,PD30575a:0/1,PD30606a:0/1
7:124499058,C/T	p.Asp219Asn	1	1	0	PD30578a		1	PD30578a	0	0
7:124499069,T/C	p,Asn215Ser	1	1	0	PD30628a		1	PD30628a	0	0
7:124499103,C/A	p.Glu204Ter	1	0	1		Ctrl_2641	1	Ctrl_2641	0	0	*False positive by capillary
7:124499111,A/G	p.Leu201Pro	3	0	3		PD30558a,Ctrl_2172,Ctrl_3226	1	PD30558a	0	0
7:124499115,C/T	p.Asp200ASn	25	7	18	Case_1704,Case_1724,Case_2062,Case_2260,Case_2381,Case_2423,Case_2763	Ctrl_2006,Ctrl_2301,Ctrl_2333,Ctrl_2335,Ctrl_2362,Ctrl_2456,Ctrl_2485,Ctrl_2496,Ctrl_2500,Ctrl_2553,Ctrl_2562,Ctrl_2565,Ctrl_2609,Ctrl_2618,Ctrl_2640,Ctrl_3093,Ctrl_3176,Ctrl_3226	1	Ctrl_2500	0	0	*False positive by capillary (one sample tested)
7:124499131,C/T	p.Trp194Ter	1	1	0	PD30692a		1	PD30692a	0	0	*False positive by capillary
7:124499158,A/T	p.Asp185Glu	2	1	1	Case_2329	Ctrl_2165	1	Case_2329,Ctrl_2165	0	0	*False positive by capillary in both samples
7:124499165,A/C	p.Val183Gly	3356	1589	1767	Case_3,Case_5,Case_6,Case_7,Case_8,Case_9,Case_11,Case_12,Case_13,Case_14	Ctrl_1,Ctrl_4,Ctrl_6,Ctrl_7,Ctrl_10,Ctrl_14,Ctrl_16,Ctrl_19,Ctrl_20,Ctrl_24,Ctrl_25,Ctrl_27,Ctrl_33,Ctrl_35,Ctrl_38,Ctrl_43,Ctrl_49,Ctrl_51,Ctrl_53,Ctrl_54,Ctrl_55,Ctrl_57,Ctrl_63,Ctrl_64,PD30749a,Ctrl_66,Ctrl_67,Ctrl_70,Ctrl_71,Ctrl_72,Ctrl_73,Ctrl_75,PD30746a,Ctrl_77,Ctrl_78,Ctrl_80,Ctrl_82,Ctrl_83,Ctrl_84,Ctrl_85,Ctrl_86,Ctrl_93,Ctrl_98,Ctrl_99,Ctrl_100,Ctrl_101,Ctrl_102,Ctrl_104,Ctrl_107,Ctrl…	77	PD30580a,PD30581a,PD30584a,PD30585a,PD30586a,PD30587a,PD30588a,PD30593a,PD30601a,PD30603a,PD30605a,PD30662a,PD30681a,PD30665a,PD30698a,PD30727a,PD30728a,PD30716a,PD30717a,PD30729a,PD30699a,PD30707a,PD30731a,PD30719a,PD30720a,PD30708a,PD30732a,PD30712a,PD30713a,PD30714a,PD30721a,PD30700a,PD30722a,PD30701a,PD30723a,PD30736a,PD30710a,PD30695a,PD30715a,PD30730a,PD30749a,PD30746a,PD30748a,PD30743a,PD3…	0	0	*Samples PD30601a and PD30681a failed library prep
7:124503420,G/A	p.Ala177Val	1	1	0	PD30632a		1	PD30632a	0	0
7:124503426,TC/T	p.Asp175Ter	1	1	0	Case_1223		1	Case_1223	0	0	*False positive by capillary
7:124503435,G/A	p.Ala172Val	1	1	0	PD30629a		1	PD30629a	0	0
7:124503453,C/T	p.Cys166Tyr	2	2	0	PD30577a,PD30663a		2	PD30577a,PD30663a	0	0
7:124503465,A/G	p.Phe162Ser	1	1	0	PD30576a		1	PD30576a	0	0
7:124503499,G/C	p.Leu151Val	1	1	0	PD30702a		1	PD30702a	1	1	PD30702a:0/1
7:124503504,G/A	p.Thr149Ile	1	1	0	PD30664a		1	PD30664a	0	0
7:124503540,C/T	p.Arg137His	1	1	0	PD30585a		1	PD30585a	1	1	PD30585a:0/1
7:124503549,T/C	p.Glu134Gly	1	1	0	PD30619a		1	PD30619a	0	0
7:124503594,GA/G	p.Ser119Ter	1	1	0	PD30656a		1	PD30656a	0	0
7:124503600,C/T	p.Arg117His	1	1	0	PD30601a		1	PD30601a	1	1	*Failed library prep, confirmed by capillary
7:124503608,G/C	p.Ile114Met	1	0	1		PD30548a	1	PD30548a	1	1	PD30548a:0/1
7:124503610,T/C	p.Ile114Val	1	0	1		PD30574a	1	PD30574a	0	0
7:124503655,A/G	p.Ser99Pro	1	1	0	PD30593a		1	PD30593a	1	1	PD30593a:0/1
7:124503660,G/A	p.Thr97Ile	1	1	0	PD30635a		1	PD30635a	0	0
7:124503676,C/T	p.Glu92Lys	1	1	0	PD30624a		1	PD30624a	0	0	*False positive by capillary
7:124503691,G/A	p.Gln87Ter	1	1	0	PD30660a		1	PD30660a	0	0
7:124510966,T/G	p.Lys85Thr	1	1	0	PD30725a		1	PD30725a	1	1	PD30725a:0/1
7:124510973,T/C	p.Arg83Gly	1	1	0	PD30624a		1	PD30624a	0	0	*False positive by capillary
7:124510982,G/A	p.Arg80Cys	2	2	0	PD30636a,PD30660a		2	PD30636a,PD30660a	0	0
7:124510988,T/C	p.Ile78Val	1	0	1		PD30750a	1	PD30750a	1	1	PD30750a:0/1
7:124510996,T/C	p.Asn75Ser	2	2	0	PD30711a,PD30718a		2	PD30711a,PD30718a	1	0.5	PD30718a:0/1
7:124511011,G/A	p.Pro70Leu	1	1	0	PD30647a		1	PD30647a	0	0
7:124511018,C/A	p.Ala68Ser	1	1	0	PD30642a		1	PD30642a	0	0
7:124511032,C/T	p.Ser63Asn	1	1	0	PD30654a		1	PD30654a	0	0
7:124511035,A/G	p.Phe62Ser	1	1	0	PD30639a		1	PD30639a	0	0
7:124511036,A/G	p.Phe62Leu	1	0	1		PD30599a	1	PD30599a	0	0
7:124511041,A/T	p.Leu60Gln	1	1	0	PD30630a		1	PD30630a	0	0
7:124511044,C/T	p.Cys59Tyr	1	0	1		PD30566a	1	PD30566a	1	1	PD30566a:0/1
7:124511081,C/T	p.Val47Ile	1	1	0	PD30689a		1	PD30689a	0	0
7:124511086,G/A	p.Ser45Leu	2	1	1	PD30616a	PD30748a	2	PD30616a,PD30748a	0	0
7:124532326,C/T	p.Gly40Arg	1	1	0	PD30634a		1	PD30634a	0	0
7:124532327,T/A	p.Lys39Asn	1	0	1		PD30751a	1	PD30751a	1	1	PD30751a:0/1
7:124532344,G/A	p.Pro34Ser	1	1	0	PD30696a		1	PD30696a	0	0	*False positive by capillary
7:124532376,A/G	p.Val23Ala	1	1	0	PD30650a		1	PD30650a	0	0
7:124532380,T/C	p.Ile22Val	5	3	2	PD30580a,PD30594a,PD30609a	PD30756a,PD30608a	5	PD30580a,PD30594a,PD30609a,PD30756a,PD30608a	5	1	PD30594a:0/1,PD30609a:0/1,PD30756a:0/1,PD30580a:0/1, PD30608a confirmed by capillary
7:124532386,C/T	p.Gly20Ser	1	1	0	PD30629a		1	PD30629a	0	0
7:124532406,G/A	p.Pro13Leu	2	2	0	PD30638a,PD30655a		2	PD30638a,PD30655a	0	0
7:124532422,T/C	p.Asn8Asp	1	1	0	PD30578a		1	PD30578a	0	0
7:124532435,C/T	c.10-1G>A	1	1	0	PD30602a		1	PD30602a	1	1	PD30602a:0/1
7:124537218,C/T	c.9+1G>A	1	1	0	PD30619a		1	PD30619a	0	0
7:124537224,A/C	p.Ser2Ala	1	0	1		PD30599a	1	PD30599a	0	0
7:124568867,A/G	c.-227+2T>C	1	0	1		PD30739a	1	PD30739a	0	0
